# Supplementary material
Source: Frontiers journal article supplement (https://www.frontiersin.org/articles/487602)
Supplement: Data_Sheet_1.pdf [file Data_Sheet_1.pdf]

## Appendix A The data collected from a large project

| Methods            |                                     | Nancy                                                                                                                                                                                                      | Megan                                        | Jason    |
|--------------------|-------------------------------------|------------------------------------------------------------------------------------------------------------------------------------------------------------------------------------------------------------|----------------------------------------------|----------|
| Observation        | <b>Classroom observation</b>        | 8x2h=16h                                                                                                                                                                                                   | 8x2h=16h                                     | 9x2h=18h |
|                    | Observation of student-teachers' TP | 3 Ss micro-teaching lessons                                                                                                                                                                                | 2 school visits on Ss micro-teaching lessons | NA       |
| Interview          | <b>Interview with teachers</b>      | 1x60 min<br>2x40 min                                                                                                                                                                                       | 1x60min                                      | 1x60min  |
|                    | Focus group interview with students | 4                                                                                                                                                                                                          | 4                                            | NA       |
|                    | Individual interview with Ss        | 6                                                                                                                                                                                                          | 4                                            | 3        |
| Documents analysis | <b>Teacher-produced</b>             | 1) lesson plans and course syllabi<br>2) assessment guidelines and essay marking criteria<br>3) exemplars uploaded in Moodle                                                                               |                                              |          |
|                    | Student-produced                    | 1) documents prepared for Ss' assessment tasks (e.g. MT and TP lessons)<br>2) written assignments<br>3) web-based and technology-generated posts, discussions, and documents relating to the group project |                                              |          |

## **Appendix B Interview questions with Nancy**

### **1st Interview Questions**

1. What is your belief of assessment?
2. What are the assessment tasks for the Pedagogy course in Year 4?
3. What is the rationale for the overall design?
4. What is the rationale for each assessment task?
5. What is the connection between these tasks?
6. How would you define metacognition?
7. How do you see the importance of students' metacognitive knowledge?
8. What kinds of assessment practices do you think would benefit students' metacognition?

### **2<sup>nd</sup> Interview Questions**

1. How do you interpret the notion of metacognition?
2. How did you apply your understanding of metacognition into your own teaching?
3. In your opinion, to what extent do your design of group assignment/project in this Year 4 (a presentation and Micro-teaching) impact on students' metacognition?
4. What is the rationale of inviting the guest teacher?
5. What is the rationale for the online Moodle discussion?
6. What is the rationale for the hurdle requirement?
7. What is your own metacognitive process in carrying out the assessment task?

### **3<sup>rd</sup> interview Questions**

1. Could you clarify what do you mean by teacher modelling?
2. What and how do your model for students?
3. To what extent do you think your modelling help with students' assessment?
4. To what extent do you think your modelling affect on students' metacognition?
5. Could you clarify the strategic grouping and free grouping in group project?

## Appendix C Classroom observation scheme

| General Information      |               |                                   |
|--------------------------|---------------|-----------------------------------|
| Date:                    | Teacher Name: | Number of Learners Present Today: |
| Main focus of lesson     |               |                                   |
| Running Record Form      |               |                                   |
| Descriptive observations |               | Interpretive analysis/comments    |
|                          |               |                                   |
| Issues emerging          |               |                                   |
